# Supplementary material for: Evaluation of Composted Organic Wastes and Farmyard Manure for Improving Fertility of Poor Sandy Soils in Arid Regions
Source: MDPI journal article supplement (doi:10.3390/agriculture11050415), 2021-05-04
Supplement: s1 [file s1]

**Table S1.** Pseudototal concentration of trace elements (average $\pm$ SD) in unamended soil and in soils amended with different doses of FYM, SSC or MSWC. Asterisks indicate significant differences from the content in the soil amended with the lowest dose of farmyard manure.

|           | Cu   |       |       | Co  |       |       | Ni<br>mg Kg <sup>-1</sup> |       |       | Zn   |       |       | Pb  |       |       | Cd   |       |      |
|-----------|------|-------|-------|-----|-------|-------|---------------------------|-------|-------|------|-------|-------|-----|-------|-------|------|-------|------|
| Unamended | 4.4  | $\pm$ | 0.4   | 1.5 | $\pm$ | 0.2   | 6.0                       | $\pm$ | 0.5   | 12.4 | $\pm$ | 1.3   | 3.4 | $\pm$ | 0.1   | 0.18 | $\pm$ | 0.02 |
| FYM-20    | 5.1  | $\pm$ | 1.7   | 1.6 | $\pm$ | 0.1   | 7.4                       | $\pm$ | 0.2   | 25.0 | $\pm$ | 0.3   | 2.5 | $\pm$ | 0.4   | 0.31 | $\pm$ | 0.05 |
| FYM-40    | 10.5 | $\pm$ | 0.8 * | 1.9 | $\pm$ | 0.2   | 9.1                       | $\pm$ | 1.2   | 35.9 | $\pm$ | 3.6 * | 4.4 | $\pm$ | 0.4   | 0.32 | $\pm$ | 0.04 |
| FYM-60    | 11.2 | $\pm$ | 1.3 * | 2.1 | $\pm$ | 0.4 * | 11.1                      | $\pm$ | 2.2 * | 50.8 | $\pm$ | 7.2 * | 6.6 | $\pm$ | 0.2 * | 0.41 | $\pm$ | 0.01 |
| SSC-20    | 5.4  | $\pm$ | 0.5   | 1.8 | $\pm$ | 0.0   | 9.2                       | $\pm$ | 0.9   | 22.4 | $\pm$ | 2.4   | 2.8 | $\pm$ | 0.5   | 0.29 | $\pm$ | 0.03 |
| SSC-40    | 12.2 | $\pm$ | 0.5 * | 2.0 | $\pm$ | 0.4   | 11.6                      | $\pm$ | 2.5 * | 31.0 | $\pm$ | 6.2   | 2.8 | $\pm$ | 0.2   | 0.31 | $\pm$ | 0.03 |
| SSC-60    | 15.7 | $\pm$ | 1.3 * | 2.4 | $\pm$ | 0.1 * | 13.3                      | $\pm$ | 0.8 * | 39.8 | $\pm$ | 3.8 * | 4.8 | $\pm$ | 0.9 * | 0.31 | $\pm$ | 0.05 |
| MSWC-20   | 5.4  | $\pm$ | 0.5   | 1.9 | $\pm$ | 0.1   | 7.3                       | $\pm$ | 0.1   | 20.3 | $\pm$ | 0.7   | 3.8 | $\pm$ | 0.4   | 0.28 | $\pm$ | 0.02 |
| MSWC-40   | 5.9  | $\pm$ | 0.2   | 1.9 | $\pm$ | 0.2   | 7.5                       | $\pm$ | 0.2   | 32.9 | $\pm$ | 4.2 * | 4.2 | $\pm$ | 0.2   | 0.30 | $\pm$ | 0.05 |
| MSWC-60   | 10.6 | $\pm$ | 2.0 * | 2.2 | $\pm$ | 0.1 * | 8.0                       | $\pm$ | 0.6   | 43.6 | $\pm$ | 1.2 * | 6.4 | $\pm$ | 1.3 * | 0.35 | $\pm$ | 0.03 |

**Table S2.** Effects of the application of the amendments on some macro-nutrient concentrations in grain and root of barley plants (mean, n = 3). Lower case letters indicate significant differences between treatments within the same harvest time. An asterisk indicates significant differences between harvest time within each treatment over time. \*P < 0.05, \*\*P < 0.01, \*\*\*P < 0.001.

|                           |    | Grain                   |                          |                          | Root                    |                          |                          |
|---------------------------|----|-------------------------|--------------------------|--------------------------|-------------------------|--------------------------|--------------------------|
|                           |    | K (g kg <sup>-1</sup> ) | Ca (g kg <sup>-1</sup> ) | Mg (g kg <sup>-1</sup> ) | K (g kg <sup>-1</sup> ) | Ca (g kg <sup>-1</sup> ) | Mg (g kg <sup>-1</sup> ) |
| 1 <sup>st</sup> harvest   |    |                         |                          |                          |                         |                          |                          |
| CNT                       | 0  | 1.8 ± 0.1 e             | 0.3 ± 0.0 e**            | 0.7 ± 0.0 f*             | 1.8 ± 0.0 e**           | 4.3 ± 0.0 f ***          | 0.3 ± 0.0 h***           |
| FYM (t ha <sup>-1</sup> ) | 20 | 3.1 ± 0.0 bc***         | 0.3 ± 0.0 de***          | 1.2 ± 0.0 cd             | 1.9 ± 0.1 e***          | 4.5 ± 0.4 f*             | 0.4 ± 0.0 gh***          |
|                           | 40 | 3.3 ± 0.0 b***          | 0.4 ± 0.0 cd***          | 1.2 ± 0.0 bcd**          | 2.2 ± 0.2 cd***         | 5.4 ± 0.1 e              | 0.5 ± 0.0 f***           |
|                           | 60 | 3.8 ± 0.2 a***          | 0.4 ± 0.0 b***           | 1.3 ± 0.0 a**            | 2.5 ± 0.3 b***          | 8.5 ± 0.1 c***           | 0.7 ± 0.1 d***           |
| SSC (t ha <sup>-1</sup> ) | 20 | 3.1 ± 0.2 bc***         | 0.4 ± 0.0 cd***          | 1.2 ± 0.0 bc***          | 2.0 ± 0.1 de***         | 7.1 ± 0.3 d***           | 0.8 ± 0.0 c**            |
|                           | 40 | 3.2 ± 0.0 b***          | 0.4 ± 0.0 cd***          | 1.2 ± 0.0 b***           | 2.3 ± 0.2 bcd***        | 9.1 ± 0.2 b***           | 0.8 ± 0.0 b**            |
|                           | 60 | 3.3 ± 0.0 b***          | 0.4 ± 0.0 a***           | 1.3 ± 0.0 a***           | 2.9 ± 0.1 a***          | 12.5 ± 0.1 a***          | 1.2 ± 0.0 a              |

|                               |    |                 |                 |                 |                 |                 |                  |
|-------------------------------|----|-----------------|-----------------|-----------------|-----------------|-----------------|------------------|
| MSWC (t ha <sup>-1</sup> )    | 20 | 2.5 ± 0.2 d     | 0.3 ± 0.0 de*** | 1.1 ± 0.0 e***  | 1.9 ± 0.2 e***  | 4.6 ± 0.3 f**   | 0.4 ± 0.0 g***   |
|                               | 40 | 2.9 ± 0.3 c     | 0.4 ± 0.0 cd*** | 1.1 ± 0.0 d***  | 2.2 ± 0.0 cd*** | 5.4 ± 0.0 e*    | 0.6 ± 0.1 e***   |
|                               | 60 | 3.2 ± 0.0 b***  | 0.4 ± 0.0 c***  | 1.3 ± 0.0 a     | 2.4 ± 0.2 bc*** | 12.4 ± 0.1 a*** | 1.2 ± 0.0 a**    |
| <b>2<sup>nd</sup> harvest</b> |    |                 |                 |                 |                 |                 |                  |
| CNT                           | 0  | 1.6 ± 0.2 f     | 0.4 ± 0.0 g**   | 0.7 ± 0.0 f*    | 2.6 ± 0.2 f**   | 3.2 ± 0.0 f***  | 1.1 ± 0.1 abc*** |
| FYM (t ha <sup>-1</sup> )     | 20 | 5.5 ± 0.1 ab*** | 1.4 ± 0.1 de*** | 1.5 ± 0.1 de    | 6.9 ± 0.0 d***  | 3.2 ± 0.2 f*    | 1.0 ± 0.0 d***   |
|                               | 40 | 5.6 ± 0.2 ab*** | 1.7 ± 0.0 c***  | 1.6 ± 0.1 cde** | 7.7 ± 0.2 c***  | 5.4 ± 0.0 d     | 1.0 ± 0.0 cd***  |
|                               | 60 | 5.8 ± 0.1 a***  | 1.8 ± 0.1 b***  | 1.7 ± 0.1 b**   | 8.6 ± 0.1 b***  | 6.5 ± 0.0 b***  | 1.2 ± 0.0 ab***  |
| SSC (t ha <sup>-1</sup> )     | 20 | 5.4 ± 0.2 b***  | 1.4 ± 0.0 ef*** | 1.6 ± 0.0 cd*** | 6.5 ± 0.1 e***  | 4.5 ± 0.1 e***  | 1.0 ± 0.0 d**    |
|                               | 40 | 5.5 ± 0.1 ab*** | 1.5 ± 0.1 de*** | 1.7 ± 0.1 bc*** | 7.7 ± 0.1 c***  | 6.2 ± 0.2 c***  | 1.1 ± 0.1 abc**  |
|                               | 60 | 5.7 ± 0.3 ab*** | 1.5 ± 0.0 d***  | 1.9 ± 0.1 a***  | 8.6 ± 0.2 b***  | 7.3 ± 0.2 a***  | 1.3 ± 0.1 a      |
| MSWC (t ha <sup>-1</sup> )    | 20 | 2.6 ± 0.3 e     | 1.3 ± 0.1 f***  | 0.8 ± 0.0 f***  | 7.8 ± 0.1 c***  | 3.2 ± 0.2 f**   | 1.0 ± 0.1 d***   |
|                               | 40 | 3.0 ± 0.2 d     | 1.3 ± 0.1 ef*** | 0.8 ± 0.1 f***  | 7.8 ± 0.0 c***  | 5.6 ± 0.1 d*    | 1.0 ± 0.1 bcd*** |
|                               | 60 | 4.7 ± 0.2 c***  | 2.1 ± 0.1 a***  | 1.4 ± 0.1 e     | 8.9 ± 0.1 a***  | 6.5 ± 0.1 b***  | 1.2 ± 0.0 ab**   |

**Table S3.** Effects of the application of the amendments on some micro-nutrient concentrations in barley grains and roots (mean, n = 3). Lower case letters indicate significant differences between treatments within the same harvest time. Asterisks indicate significant differences between harvest time within each treatment over time. \*P < 0.05, \*\*P < 0.01, \*\*\*P < 0.001

|                               |    | Grain                     |                           |                           |                           | Root                      |                           |                           |                           |
|-------------------------------|----|---------------------------|---------------------------|---------------------------|---------------------------|---------------------------|---------------------------|---------------------------|---------------------------|
|                               |    | Fe (mg kg <sup>-1</sup> ) | Mn (mg kg <sup>-1</sup> ) | Zn (mg kg <sup>-1</sup> ) | Cu (mg kg <sup>-1</sup> ) | Fe (mg kg <sup>-1</sup> ) | Mn (mg kg <sup>-1</sup> ) | Zn (mg kg <sup>-1</sup> ) | Cu (mg kg <sup>-1</sup> ) |
| <b>1<sup>st</sup> harvest</b> |    |                           |                           |                           |                           |                           |                           |                           |                           |
| CNT                           | 0  | 30.6 ± 0.3 e              | 7.9 ± 0.2 c               | 24.2 ± 0.2 c              | 2.2 ± 0.2 e               | 111.0 ± 0.7 g*            | 6.7 ± 0.1 e*              | 8.1 ± 0.0 f***            | 3.4 ± 0.1 f               |
| FYM (t ha <sup>-1</sup> )     | 20 | 37.5 ± 0.1 d**            | 8.5 ± 0.3 bc              | 25.3 ± 0.2 bc*            | 3.5 ± 0.2 d***            | 137.9 ± 8.9 f**           | 6.7 ± 0.5 e**             | 12.4 ± 0.4 de***          | 3.5 ± 0.2 f               |
|                               | 40 | 38.7 ± 0.2 cd**           | 8.9 ± 0.7 b               | 25.7 ± 1.5 bc*            | 5.1 ± 0.8 c**             | 230.6 ± 23.3 e            | 9.5 ± 0.6 cde*            | 13.9 ± 0.7 d***           | 4.0 ± 0.2 e***            |
|                               | 60 | 47.7 ± 1.0 b              | 9.2 ± 0.1 b               | 27.0 ± 0.1 b***           | 6.3 ± 0.1 b***            | 255.9 ± 26.6 d**          | 10.0 ± 0.8 cd*            | 13.8 ± 0.6 d***           | 4.6 ± 0.3 d**             |
| SSC (t ha <sup>-1</sup> )     | 20 | 39.0 ± 2.7 cd             | 9.3 ± 0.8 b               | 24.6 ± 0.3 c              | 4.8 ± 0.6 c               | 159.2 ± 18.6 f            | 10.3 ± 1.1 cd             | 17.4 ± 0.7 bc***          | 5.1 ± 0.3 c               |
|                               | 40 | 41.3 ± 2.7 c              | 10.7 ± 1.0 a*             | 26.0 ± 1.7 bc             | 6.2 ± 0.7 b               | 257.5 ± 10.5 d            | 11.7 ± 1.4 c              | 18.9 ± 1.7 ab***          | 6.3 ± 0.2 b***            |

|                               |    |                  |                |                  |                 |                   |                |                  |                 |
|-------------------------------|----|------------------|----------------|------------------|-----------------|-------------------|----------------|------------------|-----------------|
| MSWC (t ha <sup>-1</sup> )    | 60 | 51.9 ± 0.5 a**   | 11.1 ± 0.3 a** | 29.7 ± 1.5 a*    | 8.9 ± 0.0 a**   | 421.3 ± 8.8 b***  | 15.1 ± 2.2 b   | 19.7 ± 1.6 a***  | 8.5 ± 0.1 a***  |
|                               | 20 | 32.0 ± 2.1 e**   | 8.7 ± 0.4 bc*  | 24.3 ± 1.1 c***  | 4.7 ± 0.1 c***  | 227.6 ± 8.8 e**   | 7.5 ± 0.9 de** | 11.7 ± 0.6 e***  | 4.2 ± 0.4 e     |
|                               | 40 | 38.6 ± 1.6 cd*   | 9.0 ± 0.5 b    | 24.9 ± 1.5 bc*** | 5.2 ± 0.3 c     | 313.9 ± 7.3 c     | 10.1 ± 1.3 cd  | 16.6 ± 0.1 c     | 5.1 ± 0.4 cd    |
|                               | 60 | 39.4 ± 2.8 cd*** | 9.4 ± 0.3 b    | 26.1 ± 2.0 bc    | 6.5 ± 0.1 b***  | 588.0 ± 1.8 a**   | 28.7 ± 3.4 a** | 17.9 ± 1.0 bc*** | 8.4 ± 0.1 a***  |
| <b>2<sup>nd</sup> harvest</b> |    |                  |                |                  |                 |                   |                |                  |                 |
| CNT                           | 0  | 34.0 ± 2.2 f     | 8.0 ± 1.7 b    | 21.5 ± 2.0 c     | 1.7 ± 0.4 g     | 135.3 ± 10.7 e*   | 8.9 ± 0.5 d*   | 12.4 ± 0.6 f***  | 3.3 ± 0.1 f     |
| FYM (t ha <sup>-1</sup> )     | 20 | 34.2 ± 0.7 f**   | 7.8 ± 0.2 b    | 22.0 ± 2.0 c*    | 1.8 ± 0.0 g***  | 190.4 ± 10.0 d**  | 11.3 ± 0.9 c** | 23.8 ± 1.1 e***  | 3.5 ± 0.1 f     |
|                               | 40 | 41.4 ± 0.6 e**   | 8.1 ± 0.3 b    | 22.5 ± 1.2 c*    | 2.4 ± 0.5 f**   | 255.2 ± 5.7 c     | 11.4 ± 0.4 c*  | 29.0 ± 1.7 c***  | 5.3 ± 0.1 d***  |
| SSC (t ha <sup>-1</sup> )     | 60 | 50.3 ± 3.6 b     | 9.1 ± 0.4 b    | 25.3 ± 0.1 ab*** | 3.7 ± 0.2 e***  | 374.4 ± 17.5 b**  | 13.4 ± 1.2 b*  | 31.9 ± 1.5 b***  | 6.4 ± 0.3 c**   |
|                               | 20 | 42.2 ± 1.4 de    | 8.1 ± 0.6 b    | 23.1 ± 1.9 bc    | 4.5 ± 0.1 d     | 193.3 ± 15.3 d    | 11.3 ± 0.7 c   | 28.1 ± 0.7 cd*** | 4.8 ± 0.2 de    |
|                               | 40 | 45.5 ± 0.8 cd    | 8.3 ± 0.2 b*   | 26.2 ± 1.1 a     | 5.5 ± 0.3 b     | 256.1 ± 9.9 c     | 11.6 ± 0.3 c   | 33.1 ± 1.9 b***  | 9.4 ± 0.5 b***  |
| MSWC (t ha <sup>-1</sup> )    | 60 | 47.5 ± 0.9 bc**  | 8.6 ± 0.3 b**  | 26.8 ± 0.3 a*    | 7.5 ± 0.3 a**   | 275.2 ± 19.4 c*** | 16.1 ± 1.9 a   | 39.8 ± 1.6 a***  | 14.3 ± 0.9 a*** |
|                               | 20 | 44.0 ± 1.9 cde** | 7.8 ± 0.1 b*   | 9.3 ± 0.6 d***   | 3.3 ± 0.2 e***  | 194.3 ± 3.6 d**   | 13.7 ± 0.6 b** | 26.7 ± 0.7 d***  | 4.2 ± 0.1 e     |
|                               | 40 | 45.9 ± 1.2 cd*   | 8.3 ± 0.7 b    | 10.8 ± 0.6 d***  | 4.7 ± 0.1 cd    | 258.3 ± 36.4 c    | 16.4 ± 1.4 a   | 32.0 ± 0.9 b     | 5.3 ± 0.1 d     |
|                               | 60 | 62.6 ± 4.0 a***  | 10.4 ± 1.2 a   | 23.3 ± 1.6 b     | 5.2 ± 0.1 bc*** | 427.1 ± 47.5 a**  | 17.3 ± 0.6 a** | 39.3 ± 0.3 a***  | 6.4 ± 0.1 c***  |
